# Supplementary material for: Silver nanoclusters: synthesis, structures and photoluminescence
Source: Royal Society of Chemistry journal article supplement (doi:10.1039/d0qm00117a), 2020-01-01
Supplement: d0qm00117a1.pdf [file d0qm00117a1.pdf]

## Silver Nanoclusters: Controlled Synthesis, Structures and Photoluminescence

Yun-Peng Xie,<sup>\*,a</sup> Yang-Lin Shen,<sup>a</sup> Guang-Xiong Duan,<sup>a</sup> Jun Han,<sup>a</sup> Lai-Ping Zhang,<sup>b</sup> Xing Lu<sup>\*,a</sup>

<sup>a</sup>State Key Laboratory of Materials Processing and Die & Mould Technology, School of Materials Science and Engineering, Huazhong University of Science and Technology (HUST), Wuhan 430074, China.

<sup>b</sup>College of Chemistry and Chemistry Engineering, Xinxiang University

Table S1. Crystal Structures of Some Ag NCs.

| Formula                                                                                                                | Core                               |                          | Shell                                                                                                                  | Ag...Ag bonds |                       | Number of free electrons | Ref.  |
|------------------------------------------------------------------------------------------------------------------------|------------------------------------|--------------------------|------------------------------------------------------------------------------------------------------------------------|---------------|-----------------------|--------------------------|-------|
|                                                                                                                        | composition                        | geometry                 | composition                                                                                                            | bond dist (Å) | average bond dist (Å) |                          |       |
| <b>Thiol-Protected Ag NCs</b>                                                                                          |                                    |                          |                                                                                                                        |               |                       |                          |       |
| [Ag <sub>25</sub> (SPhMe <sub>2</sub> ) <sub>18</sub> ] <sup>-</sup>                                                   | Ag <sub>13</sub>                   | icosahedron              | Ag <sub>12</sub> (SPhMe <sub>2</sub> ) <sub>18</sub>                                                                   | 2.749–3.221   | 2.910                 | 8                        | 23    |
| [Ag <sub>29</sub> (BDT) <sub>12</sub> (PPh <sub>3</sub> ) <sub>4</sub> ] <sup>3-</sup>                                 | Ag <sub>13</sub>                   | icosahedron              | Ag <sub>16</sub> S <sub>24</sub> P <sub>4</sub>                                                                        | 2.755–3.158   | 2.955                 | 8                        | 24    |
| [Ag <sub>34</sub> S <sub>2</sub> (PhCH <sub>2</sub> S) <sub>18</sub> (CF <sub>3</sub> CO <sub>2</sub> ) <sub>9</sub> ] | Ag <sub>13</sub>                   | icosahedron              | [Ag <sub>21</sub> S <sub>2</sub> (PhCH <sub>2</sub> S) <sub>18</sub> (CF <sub>3</sub> CO <sub>2</sub> ) <sub>9</sub> ] | 2.719–3.190   | 2.963                 | 3                        | 140   |
| [Ag <sub>44</sub> (SR) <sub>30</sub> ] <sup>4-</sup>                                                                   | Ag <sub>12</sub> @Ag <sub>20</sub> | icosahedron@dodecahedron | Ag <sub>12</sub> (SR) <sub>30</sub>                                                                                    | 2.812–3.223   | 2.957                 | 18                       | 25,26 |
| Ag <sub>50</sub> (dppm) <sub>6</sub> (SR) <sub>30</sub>                                                                | Ag <sub>12</sub> @Ag <sub>20</sub> | icosahedron@dodecahedron | Ag <sub>18</sub> (dppm) <sub>6</sub> (SR) <sub>30</sub>                                                                | 2.764–3.049   | 2.910                 | 20                       | 60    |
| [Ag <sub>62</sub> S <sub>12</sub> (SBU') <sub>32</sub> ] <sup>2+</sup>                                                 | Ag <sub>14</sub>                   | face-centered cube       | Ag <sub>48</sub> (SBU') <sub>32</sub>                                                                                  | 2.845–3.228   | 3.056                 | 4                        | 64    |

|                                                                               |                               |                                                                                                                                                  |                                                                                                                                                                |              |        |    |       |
|-------------------------------------------------------------------------------|-------------------------------|--------------------------------------------------------------------------------------------------------------------------------------------------|----------------------------------------------------------------------------------------------------------------------------------------------------------------|--------------|--------|----|-------|
| $[\text{Ag}_{62}\text{S}_{13}(\text{SBU}')_{32}]^{2+}$                        | $\text{S}@Ag_{14}$            | twisty face-centered cube                                                                                                                        | $\text{Ag}_{48}(\text{SBU}')_{32}$                                                                                                                             | 2.876–3.220  | 3.064  | 2  | 66    |
| $[\text{Ag}_{46}\text{S}_7(\text{SPhMe}_2)_{24}]^+$                           | $\text{Ag}_6\text{S}@Ag_{32}$ | face-centered cube                                                                                                                               | $\text{Ag}_8\text{S}_6(\text{SPhMe}_2)_{24}$                                                                                                                   | 2.744–2.963  | 2.905  | 7  | 67    |
| $\text{Ag}_{14}(\text{SC}_6\text{H}_3\text{F}_2)_{12}(\text{PPh}_3)_8$        | $\text{Ag}_{14}$              | face-centered cube                                                                                                                               | $\text{Ag}_8(\text{SC}_6\text{H}_3\text{F}_2)_{12}(\text{PPh}_3)_8$                                                                                            | 2.810–2.850  | 2.830  | 2  | 68    |
| $\text{Ag}_{23}(\text{PPh}_3)_8(\text{SC}_2\text{H}_4\text{Ph})_{18}$         | $\text{Ag}_{11}$              | helical face-centered cube                                                                                                                       | $\text{Ag}_{12}(\text{PPh}_3)_8(\text{SC}_2\text{H}_4\text{Ph})_{18}$                                                                                          | 2.744–3.225  | 2.905  | 5  | 69    |
| $[\text{Ag}_{38}(\text{SPhF}_2)_{26}(\text{PPh}_3)_8]$                        | $\text{Ag}_{28}$              | fcc close-packing                                                                                                                                | $\text{Ag}_{10}(\text{SPhF}_2)_{26}(\text{PPh}_3)_8$                                                                                                           | 2.724–3.225  | 2.937  | 12 | 70    |
| $[\text{Ag}_{63}(\text{SPhF}_2)_{36}(\text{PR}'_3)_8]^+$                      | $\text{Ag}_{47}$              | fcc close-packing                                                                                                                                | $\text{Ag}_{16}(\text{SPhF}_2)_{36}(\text{PR}'_3)_8$                                                                                                           | 2.832–3.204  | 2.919  | 26 | 71    |
| $[\text{Ag}_{67}(\text{SPhMe}_2)_{32}(\text{PPh}_3)_8]^{3+}$                  | $\text{Ag}_{23}$              | $\text{Ag}_{13}$ cuboctahedron sharing with $\text{Ag}_8$ crowns to form $\text{Ag}_{21}$ metal core, which is again connected with two Ag atoms | $[\text{Ag}_{44}(\text{SPhMe}_2)_{32}(\text{PPh}_3)_8]$                                                                                                        | 2.846–3.048, | 2.9195 | 32 | 75    |
| $[\text{Ag}_{46}(\text{SPhMe}_2)_{24}(\text{PPh}_3)_8](\text{NO}_3)_2$        | $\text{Ag}_{14}$              | face-centered cube                                                                                                                               | $[\text{Ag}_{32}(\text{SPhMe}_2)_{24}(\text{PPh}_3)_8]$                                                                                                        | 2.770–3.218  | 3.037  | 20 | 73,74 |
| $[\text{Ag}_{43}(\text{SPhMe}_2)_{25}(\text{PPh}_3)_4]$                       | $\text{Ag}_{12}@Ag_{20}$      | icosahedron@dodecahedron                                                                                                                         | $\text{Ag}_2\text{S}_5\text{P}$ , $\text{Ag}_4\text{S}_8\text{P}$ , $\text{Ag}_2\text{S}_4\text{P}$ and $\text{Ag}_3\text{S}_6\text{P}$ , and $\text{SPhMe}_2$ |              |        | 18 | 73    |
| $[\text{Ag}_{40}(\text{SPhMe}_2)_{24}(\text{PPh}_3)_8](\text{NO}_3)_2$        | $\text{Ag}_8$                 | cube                                                                                                                                             | $[\text{Ag}_{32}(\text{SPhMe}_2)_{24}(\text{PPh}_3)_8]$                                                                                                        | 2.770–3.218  | 3.037  | 14 | 73,74 |
| $\text{Ag}_{40}(\text{SPhMe}_2)_{24}(\text{PPh}_3)_8\text{H}_{12}$            | $\text{Ag}_8$                 | cube                                                                                                                                             | $[\text{Ag}_{32}(\text{SPhMe}_2)_{24}(\text{PPh}_3)_8]$                                                                                                        |              | 3.197  | 2  | 76    |
| $\text{Ag}_{16}(\text{SC}_6\text{H}_3\text{F}_2)_{14}(\text{dppe})_4$         | $\text{Ag}_8$                 | nearly rhombus $\text{Ag}_4$ unit capped by two $\text{Ag}_2$ units above and below the rhombus                                                  | $[\text{Ag}_8(\text{dppe})_4(\text{SC}_6\text{H}_3\text{F}_2)_{14}]$                                                                                           | 2.694–3.040  | 2.845  | 2  | 80    |
| $[\text{Ag}_{32}(\text{dppe})_5(\text{SC}_6\text{H}_3\text{CF}_3)_{24}]^{2-}$ | $\text{Ag}_{22}$              | pentagon face-sharing bi(pentagonal antiprism) $\text{Ag}_{17}$ unit                                                                             | $[\text{Ag}_{10}(\text{dppe})_5(\text{SC}_6\text{H}_3\text{F}_2)_{24}]^{14-}$                                                                                  | 2.657–3.089  | 2.917  | 10 | 80    |

|                                                                                                                                              |                     |                                                                                                       |                                                                                                                                 |             |       |    |    |
|----------------------------------------------------------------------------------------------------------------------------------------------|---------------------|-------------------------------------------------------------------------------------------------------|---------------------------------------------------------------------------------------------------------------------------------|-------------|-------|----|----|
|                                                                                                                                              |                     | that is side-capped by one Ag atom and one near-square Ag <sub>4</sub> unit at the opposite direction |                                                                                                                                 |             |       |    |    |
| Ag <sub>78</sub> (dppp) <sub>6</sub> (SR) <sub>42</sub><br>Ag <sub>78</sub> (R/S-bdpp) <sub>6</sub> (SR) <sub>42</sub>                       | Ag@Ag <sub>21</sub> | three mutually interpenetrating icosahedron                                                           | Ag <sub>44</sub> (dppp) <sub>6</sub> (SR) <sub>42</sub>                                                                         | 2.760-3.078 | 2.869 | 36 | 81 |
| [Ag <sub>32</sub> (dppm) <sub>5</sub> (SAdm) <sub>13</sub> Cl <sub>8</sub> ] <sup>3+</sup>                                                   | Ag <sub>13</sub>    | icosahedron                                                                                           | [Ag <sub>19</sub> (dppm) <sub>5</sub> (SAdm) <sub>13</sub> Cl <sub>8</sub> ]                                                    | 2.721-3.316 | 3.023 | 8  | 82 |
| [Ag <sub>45</sub> (dppm) <sub>4</sub> (S'Bu) <sub>16</sub> Br <sub>12</sub> ] <sup>3+</sup>                                                  | Ag <sub>23</sub>    | two Ag <sub>13</sub> icosahedron fused the three face sharing Ag atoms                                | [Ag <sub>22</sub> (dppm) <sub>4</sub> (SBut) <sub>16</sub> Br <sub>12</sub> ]                                                   | 2.716-3.049 | 2.897 | 14 | 82 |
| Ag <sub>33</sub> (SCH <sub>2</sub> CH <sub>2</sub> Ph) <sub>24</sub> (PPh <sub>3</sub> ) <sub>4</sub>                                        | Ag <sub>13</sub>    | icosahedron                                                                                           | Ag <sub>20</sub> (SCH <sub>2</sub> CH <sub>2</sub> Ph) <sub>24</sub> (PPh <sub>3</sub> ) <sub>4</sub>                           | 2.780-3.083 | 2.933 | 9  | 83 |
| [Ag <sub>22</sub> (dppe) <sub>4</sub> (2,5-DMBT) <sub>12</sub> Cl <sub>4</sub> ] <sup>2+</sup>                                               | Ag <sub>10</sub>    | combination of two perpendicularly connected Ag <sub>5</sub> distorted trigonal bipyramidal units     | Ag <sub>12</sub> (dppe) <sub>4</sub> (2,5-DMBT) <sub>12</sub> Cl <sub>4</sub>                                                   | 2.757-3.168 | 2.862 | 4  | 89 |
| <b>Alkynyl-Protected Ag CNs</b>                                                                                                              |                     |                                                                                                       |                                                                                                                                 |             |       |    |    |
| [Ag <sub>19</sub> (dppm) <sub>3</sub> (PhC≡C) <sub>14</sub> ] <sup>3+</sup>                                                                  | Ag <sub>13</sub>    | anticuboctahedron                                                                                     | [Ag <sub>6</sub> (dppm) <sub>3</sub> (PhC≡C) <sub>14</sub> ]                                                                    | 2.867-3.228 | 3.014 | 2  | 93 |
| [Ag <sub>25</sub> (dpppe) <sub>3</sub> (MeOPhC≡C) <sub>20</sub> ] <sup>3+</sup>                                                              | Ag <sub>13</sub>    | anticuboctahedron                                                                                     | [Ag <sub>12</sub> (dpppe) <sub>3</sub> (MeOPhC≡C) <sub>20</sub> ]                                                               | 2.877-3.489 | 3.024 | 2  | 93 |
| [Ag <sub>34</sub> (BTCA) <sub>3</sub> ( <sup>t</sup> BuC≡C) <sub>9</sub> (tfa) <sub>4</sub> (CH <sub>3</sub> OH) <sub>3</sub> ] <sup>+</sup> | Ag <sub>13</sub>    | icosahedron                                                                                           | [Ag <sub>21</sub> (BTCA) <sub>3</sub> ( <sup>t</sup> BuC≡C) <sub>9</sub> (tfa) <sub>4</sub> (CH <sub>3</sub> OH) <sub>3</sub> ] | 2.795-3.078 | 2.945 | 8  | 94 |
| [Ag <sub>35</sub> (H <sub>2</sub> BTCA) <sub>2</sub> (BTCA)( <sup>t</sup> BuC≡C) <sub>16</sub> ] <sup>3+</sup>                               | Ag <sub>13</sub>    | icosahedron                                                                                           | [Ag <sub>22</sub> (H <sub>2</sub> BTCA) <sub>2</sub> (BTCA)( <sup>t</sup> BuC≡C) <sub>16</sub> ]                                | 2.702-3.230 | 2.931 | 8  | 95 |
| Ag <sub>48</sub> ( <sup>t</sup> BuC≡C) <sub>20</sub> (CrO <sub>4</sub> ) <sub>7</sub>                                                        | Ag <sub>23</sub>    | two classic Ag <sub>13</sub> icosahedron connected by sharing one apical                              | Ag <sub>25</sub> ( <sup>t</sup> BuC≡C) <sub>20</sub> (CrO <sub>4</sub> ) <sub>7</sub>                                           | 2.722-3.434 | 2.912 | 14 | 97 |

|                                                                                                    |                                  |                                                                                                |                                                                   |             |       |    |     |
|----------------------------------------------------------------------------------------------------|----------------------------------|------------------------------------------------------------------------------------------------|-------------------------------------------------------------------|-------------|-------|----|-----|
|                                                                                                    |                                  | Ag atom but missing two vertexes at two pole sites                                             |                                                                   |             |       |    |     |
| $[\text{Ag}_{51}(\text{tBuC}\equiv\text{C})_{32}]^+$                                               | $\text{Ag}@Ag_{14}$              | hexacapped body centered cube                                                                  | $\text{Ag}_{32}(\text{tBuC}\equiv\text{C})_{32}$                  | 2.695–3.383 | 2.872 | 18 | 36  |
| $[\text{Ag}_{74}(\text{C}\equiv\text{CPh})_{44}]^{2+}$                                             | $\text{Ag}_4@Ag_{22}$            | fusion of four centered $\text{Ag}_{13}$ icosahedrons by sharing the $\text{Ag}_4$ tetrahedron | $\text{Ag}_{48}(\text{C}\equiv\text{CPh})_{44}$                   | 2.722–3.222 | 2.941 | 28 | 35  |
| $(\text{C}_7\text{H}_{17}\text{ClN})_3[\text{Ag}_{112}\text{Cl}_6(\text{C}\equiv\text{CAr})_{51}]$ | $\text{Ag}_{13}@Ag_{42}@Ag_{48}$ | icosahedron@ Mackay polyhedron                                                                 | $[\text{Ag}_9\text{Cl}_6(\text{C}\equiv\text{CAr})_{51}]$         | 2.716–3.442 | 2.921 | 58 | 96  |
| <b>Other Ligand-Protected Ag NCs</b>                                                               |                                  |                                                                                                |                                                                   |             |       |    |     |
| $[\text{Ag}_{20}\{\text{S}_2\text{P}(\text{OR})_2\}_{12}]$                                         | $\text{Ag}_{13}$                 | icosahedron                                                                                    | $[\text{Ag}_7\{\text{S}_2\text{P}(\text{OR})_2\}_{12}]$           | 2.793–3.009 | 2.912 | 8  | 99  |
| $[\text{Ag}_{21}\{\text{S}_2\text{P}(\text{O}^i\text{Pr})_2\}_{12}]^+$                             | $\text{Ag}_{13}$                 | icosahedron                                                                                    | $[\text{Ag}_8\{\text{S}_2\text{P}(\text{O}^i\text{Pr})_2\}_{12}]$ | 2.754–2.998 | 2.911 | 8  | 98  |
| $[\text{Ag}_{20}\{\text{Se}_2\text{P}(\text{O}^i\text{Pr})_2\}_{12}]$                              | $\text{Ag}_{13}$                 | icosahedron                                                                                    | $[\text{Ag}_7\{\text{Se}_2\text{P}(\text{OR})_2\}_{12}]$          | 2.751–3.010 | 2.965 | 8  | 100 |
| $[\text{Ag}_{21}\{\text{Se}_2\text{P}(\text{OEt})_2\}_{12}]^+$                                     | $\text{Ag}_{13}$                 | icosahedron                                                                                    | $[\text{Ag}_8\{\text{Se}_2\text{P}(\text{OR})_2\}_{12}]$          | 2.756–3.018 | 2.911 | 8  | 100 |
| $[\text{Ag}_{21}(\text{dpa})_{12}]^+$                                                              | $\text{Ag}_{13}$                 | icosahedron                                                                                    | $[\text{Ag}_8(\text{dpa})_{12}]$                                  | 2.757–2.832 | 2.790 | 8  | 101 |
| $[\text{Ag}_{22}(\text{dpa})_{12}]^{2+}$                                                           | $\text{Ag}_{13}$                 | icosahedron                                                                                    | $[\text{Ag}_9(\text{dpa})_{12}]$                                  | 2.770–3.168 | 2.933 | 8  | 101 |
| $[\text{Ag}_{15}(\text{Ntriphos})_4(\text{Cl}_4)]^{3+}$                                            | $\text{Ag}@Ag_8$                 | body-centered cube                                                                             | $\text{Ag}_6(\text{Ntriphos})_4(\text{Cl}_4)$                     | 2.570–3.160 | 2.891 | 8  | 102 |
| $\text{Ag}_{28}(\text{dppb})_6(\text{MoO}_4)_4$                                                    | $\text{Ag}_4$                    | tetrahedron                                                                                    | $\text{Ag}_{24}(\text{dppb})_6(\text{MoO}_4)_4$                   | 2.681–3.230 | 2.887 | 20 | 103 |
| $[\text{Ag}_{27}(\text{Si}_2\text{W}_{18}\text{O}_{66})_3]^{17+}$                                  | $\text{Ag}_{27}$                 | fusion of five octahedral $\{\text{Ag}_6\}$ units                                              | $(\text{Si}_2\text{W}_{18}\text{O}_{66})_3$                       | 2.710–3.020 | 2.842 | 10 | 106 |

Table S2. Optical Properties of some Ag NCs.

| Formula                                                                                                               | UV-vis absorption<br>(nm) | Photoluminescence |             | State                           | Ref. |
|-----------------------------------------------------------------------------------------------------------------------|---------------------------|-------------------|-------------|---------------------------------|------|
|                                                                                                                       |                           | Ex. (nm)          | Em. (nm)    |                                 |      |
| Ag <sub>14</sub> (SC <sub>6</sub> H <sub>3</sub> F <sub>2</sub> ) <sub>12</sub> (PPh <sub>3</sub> ) <sub>8</sub>      | 368, 530                  | 360               | 420, 536 nm | liquid                          | 68   |
| Ag <sub>16</sub> (dppe) <sub>4</sub> (SC <sub>6</sub> H <sub>3</sub> F <sub>2</sub> ) <sub>14</sub>                   | 485                       | 360               | 440         |                                 | 80   |
| {Ag <sub>32</sub> (dppe) <sub>5</sub> (SC <sub>6</sub> H <sub>3</sub> CF <sub>3</sub> ) <sub>24</sub> } <sup>2-</sup> | 485, 550                  | 360               | 440         |                                 | 80   |
| [Ag <sub>20</sub> {S <sub>2</sub> P(OR) <sub>2</sub> } <sub>12</sub> ]                                                | 443, 492, 540             | 425               | 950         |                                 | 99   |
| [Ag <sub>21</sub> {S <sub>2</sub> P(O <sup>i</sup> Pr) <sub>2</sub> } <sub>12</sub> ] <sup>+</sup>                    | 425, 482, 540             | 435               | 921         |                                 | 98   |
| [Ag <sub>22</sub> (dppe) <sub>4</sub> (2,5-DMBT) <sub>12</sub> Cl <sub>4</sub> ] <sup>2+</sup>                        | 368, 512, 670             | -                 | 670         |                                 | 89   |
| Ag <sub>23</sub> (PPh <sub>3</sub> ) <sub>8</sub> (SC <sub>2</sub> H <sub>4</sub> Ph) <sub>18</sub>                   | 527                       | 350, 467, 540     | 800         |                                 | 69   |
| [Ag <sub>25</sub> (SPhMe <sub>2</sub> ) <sub>18</sub> ] <sup>-</sup>                                                  | 410, 490, 675             |                   | 850         |                                 | 23   |
| Ag <sub>29</sub> (BDT) <sub>12</sub> (TPP) <sub>4</sub>                                                               | 477, 513                  | 450               | 659         | liquid                          | 24   |
|                                                                                                                       |                           |                   | 715         | solid                           |      |
| Ag <sub>33</sub> (SCH <sub>2</sub> CH <sub>2</sub> Ph) <sub>24</sub> (PPh <sub>3</sub> ) <sub>4</sub>                 | 460, 540                  | 530, 600, 700     | 765, 810    | liquid                          | 83   |
| [Ag <sub>46</sub> S <sub>7</sub> (SPhMe <sub>2</sub> ) <sub>24</sub> ] <sup>+</sup>                                   | 430, 514, 651             | 325               | 550         | liquid                          | 67   |
|                                                                                                                       |                           |                   | 620         | solid                           |      |
| Ag <sub>48</sub> ( <sup>t</sup> BuC≡C) <sub>20</sub> (CrO <sub>4</sub> ) <sub>7</sub>                                 | 309, 397, 491             | 288               | 420         | liquid                          | 97   |
| [Ag <sub>51</sub> ( <sup>t</sup> BuC≡C) <sub>32</sub> ] <sup>+</sup>                                                  | 383, 484, 642             |                   | 372         | CH <sub>2</sub> Cl <sub>2</sub> | 36   |
|                                                                                                                       |                           |                   | 378         | CHCl <sub>3</sub>               |      |
|                                                                                                                       |                           |                   | 436         | CH <sub>3</sub> CN              |      |
|                                                                                                                       |                           |                   | 444         | CH <sub>3</sub> OH              |      |
| [Ag <sub>67</sub> (SPhMe <sub>2</sub> ) <sub>32</sub> (PPh <sub>3</sub> ) <sub>8</sub> ] <sup>3+</sup>                | 425, 697                  | 490               | 820         | liquid                          | 75   |
